# Establishing Prokaryotic Expression System of Angiotensin- Converting Enzyme 2 (ACE2) gene in pigs

1 Hang Xiao, Xin-Tian Nie<sup>2</sup>, Xiao-Xia Ji, Shu-ping Yan, Bin  
2 Zhu, Yuan-Shu Zhang<sup>1</sup>

3 (Key Laboratory of Animal Physiology and Biochemistry, Ministry of Agriculture,  
4 Nanjing Agricultural University 210095)

5 <sup>1</sup> Corresponding author: Yuanshu Zhang, Key Laboratory of Animal Physiology and  
6 Biochemistry College of Veterinary Medicine, Nanjing Agricultural University  
7 (China) E-Mail: zhangyuanshu@njau.edu.cn

8 <sup>2</sup> author: Xintian Nie, Key Laboratory of Intelligent Agricultural equipment in Jiangsu  
9 Province, Nanjing Agricultural University (China). E-Mail: niexintian@pk.njau.edu.cn

## 10 Abstract

11 In this paper, ACE2 gene of pigs was cloned and the purified protein was obtained via  
12 the prokaryotic expression system. Polyclonal antibody of high titer and sensitivity  
13 was obtained using Wistar rats immunization method and is then used to determine of  
14 the expression of ACE2 using immunohistochemistry. The sequence of ACE2 in pigs  
15 covered 2418 nucleotides and coded 805 amino acid (aa) residues. Sequence  
16 homology analysis showed that the ACE2 sequence in pigs is highly conserved  
17 among species at the nucleotide and amino acid levels. Genetic evolution analysis  
18 revealed that ACE2 gene in pigs has the shortest genetic distance with that in goats  
19 while residing in a totally different branch from that in zebra fishes. Analysis of  
20 protein structure predicted that ACE2 protein is a transmembrane secreted protein  
21 with high hydrophilicity, containing a signal peptide sequences locating between 1aa  
22 to 17aa. The ACE2 fusion protein expressed (under the induction with 1.0 mmol/L  
23 IPTG for 10 h) was of approximately 100 kDa and mainly existed in inclusion body.  
24 Wistar rats immunization showed that the titer of the anti-ACE2 antiserum in rats was  
25 1: 3200. Western blot showed that the antibody binds specifically.

26 Immunohistochemistry showed that the ACE2 protein was expressed in all major  
27 tissues of pigs. It is the first time that polyclonal antibody of ACE2 in pigs was  
28 obtained and the expression of ACE2 was confirmed. These results will provide a  
29 basis for investigating on ACE2's biological activity in pigs.

30 **Key words:** Angiotensin Converting Enzyme 2, Pig, Gene cloning, Bioinformatics  
31 analysis, Expression

## 32 **1 INTRODUCTION**

33 The renin–angiotensin system (RAS) is an importance regulator of  
34 cardiovascular and renal function, both under physiological and pathological  
35 conditions(Tipnis et al., 2000). Angiotensin converting enzyme 2 (ACE2) was  
36 discovered as a new member of the RAS system in 2000. Earlier studies showed that  
37 ACE2 in rats or humans was highly expressed in the kidney, heart and testicle tissues,  
38 and was later confirmed existence in the lungs, brain, and the intestines and other  
39 organs(Lambert et al., 2010; Pei et al., 2010; Briones et al., 2010; Imai et al., 2005)  
40 The ACE2 genes in human, rat and mouse have been located on the X chromosome.  
41 The ACE2 protein main structure consists of an extracellular N terminal catalytic  
42 domain, a transmembrane region and a C terminal anchored on the cell  
43 membrane(Danilczyk et al., 2006). The metalloproteinases, such as ADAM metal  
44 protease domain 17 (ADAM17), can hydrolyze the extracellular domain (which is of  
45 enzyme activity) to produce active soluble ACE2 form, which has carboxypeptidase  
46 activity and participates in the hydrolysis of AngI, AngII and other peptides. Among  
47 all, the main function of it is to hydrolyze the phenylalanine at the C-end of the AngII  
48 to produce Ang (1-7). Ang (1-7) is later combined with the Mas receptor and plays  
49 various protective functions, which antihypertensive activities and exhibits some  
50 biological actions that are quite distinct from Ang II(Hashimoto et al., 2012; Wang et  
51 al., 2016).

52 So far, the research on ACE2 has been focused on rodents and human beings.  
53 The research gaps in other animals, especially production animals, such as cattle,  
54 sheep, pigs still need to be filled. Particularly, GenBank still lacks the information of  
55 ACE2 gene in pigs. Recently, Zhang has reported a segment of the ACE2 gene  
56 sequence in Chinese Jiangsu local Hybrid Pigs(Zhang et al., 2012). However the size  
57 of the gene fragment is only 641 bp.

58 Therefore, this study was aimed at determining the whole cDNA sequence of  
59 porcine ACE2 gene using gene cloning and other molecular biology techniques and  
60 establishing a prokaryotic expression system of ACE2 in pigs. The porcine ACE2

61 polyclonal antibody was obtained and the expression distribution of ACE2 was  
62 determined. We hope to be able to provide the whole sequence of ACE2 gene and other  
63 related information for Genbank.

## 64 **2 MATERIALS AND METHODS**

### 65 **2.1 Ethics Statement**

66 All animal procedures were approved by the Institutional Animal Care and Use  
67 Committee of Nanjing Agricultural University. The protocols were reviewed and  
68 approved, and the project number 2011CB100802 was assigned. The slaughter and  
69 sampling procedures strictly followed the ‘Guidelines on Ethical Treatment of  
70 Experimental Animals’ (2006) no. 398 established by the Ministry of Science and  
71 Technology, China and the ‘Regulation regarding the Management and Treatment of  
72 Experimental Animals’ (2008) no. 45 set by the Jiangsu Provincial People’s  
73 Government.

### 74 **2.2 Samples collection**

75 The Healthy newborn piglets were terminally anesthetized via an intraperitoneal  
76 (ip.) injection of 20% urethane (5 mL/kg body weight), were decapitated within 15  
77 min after anesthesia took effect (i.e. animals lost consciousness and whole body muscle  
78 relaxation was observed), and all tissues including heart, liver, lung, kidney, stomach  
79 and soon were collected and frozen immediately in liquid nitrogen and then stored at  
80 -80°C , Part of tissues were fixed immediately with 4% buffered paraformaldehyde  
81 for 24 hours, then transferred to 20% sucrose solution for 3 h.

### 82 **2.3 Primer design**

83 Primers for the ACE2 and  $\beta$ -actin genes were designed with Primer 5.0 software  
84 and were synthesized by Dingguo, Beijing, China based on their respective porcine  
85 sequences to produce an amplification product. which the primers for  $\beta$ -actin (an I  
86 nternal control) were forward 5'-GATCTGGCACCACACCTTCT-3', and reverse  
87 5'-CCAGAGGCATACAGGGACAG3'; and the primers for ACE2 were forward 5'  
88 GGATCCATGTCAGGCTCTTTCTGGCT-3', and reverse  
89 5'-GAGCTCCTAAAACGAAGTCTGAATGTCATCGC-3'; The expected size of the

90 porcine ACE2 gene product was 2418 bp (GenBank accession no. NM\_001123070).

## 91 **2.4 RNA extraction and RT-PCR**

92 Total RNA was extracted by using the RNeasy mini kit (Qiagen, Valencia CA),  
93 and RNA concentrations were determined by a ultraviolet colorimetry  
94 (ThermoScientific, Wilmington, DE). One microgram of total RNA was reverse  
95 transcribed to cDNA using two step reverse transcription inversion following the  
96 manufacturer's protocol. ACE2 mRNA expression were amplified by PCR with  
97  $\beta$ -actin as an internal control (Bt03279175); The amplification conditions of PCR  
98 reaction were 95°C for 5 min, 32 cycles of denaturation at 98 °C for 10 sec, annealing  
99 at 57°C for 15 sec, extension at 72°C for 30 sec, and finally an additional extension  
100 step at 72°C for 10 min. The amplified products were identified by 1% agarose gel  
101 electrophoresis.

## 102 **2.5 Purification, cloning and sequence analysis of PCR products**

### 103 **2.5.1 Purification of PCR products**

104 The target gene from PCR was recovered by a gel Recovery Kit (Axygen, USA) ,  
105 and the PCR products recovered were connected with pMD-19T carrier (Takara,  
106 Japan) , then converted to DH5 alpha receptive cells (Vazyme, China), and evenly  
107 coated into the LB agar plate containing 0.1 mM ampilin for single monoclonal  
108 colony culture. After 18 h, positive colony was collected. and the bacteria solution  
109 was verified by PCR. The PCR reaction and conditions were the same as described  
110 previously.

### 111 **2.5.2 Cloning of PCR products**

112 Omega Plasmid Extraction Kit was used to extract recombinant plasmid vector.  
113 The extracted plasmid was identified by single enzyme digestion (HindIII) and double  
114 enzyme digestion (BamHI and SacI) according to the Takara enzyme product  
115 instructions, and the enzyme digestion products were identified by 1% agarose gel  
116 electrophoresis.

117 The amino acid sequence was deduced from the Editseq program in DNASTAR  
118 software and MegAlign software plotted the genetic evolution tree for affinity  
119 analysis. SignalP 4.1 (<http://www.cbs.dtu.dk/services/SignalP/>) predicted the location

120 and sequence of the protein amino acid as well as the sequence signal peptide of the  
121 ACE2 gene encoding. TMHMM Server v.2.0 (<http://www.cbs.dtu.dk/services/TMHMM/>)  
122 predict the transmembrane and transmembrane directions of ACE2 encoded protein  
123 and Kyte-Doolittle method predicts the hydrophilic region by DNASTAR software.

## 124 **2.6 Construction and identification of recombinant expression vector**

125 The plasmid of pMD-19T-ACE2 and pET-32a was digested by BamHI, SacI  
126 enzyme, the target fragment was recovered and the recombinant protein expression  
127 vector pET-32a-ACE2 was constructed used T4 DNA ligase, and transformed into  
128 Escherichia coli DH5 alpha. The positive recombinant plasmid were screened for the  
129 monoclonal bacterial liquid PCR and the double enzyme digestion.

## 130 **2.7 Induction and expression of fusion protein**

131 The Escherichia coli BL21 (DE3) containing the recombinant plasmid containing  
132 pET-32a-ACE2 was inoculated into the liquid medium LB containing Amp (100  
133  $\mu\text{g}/\text{mL}$ ), 37°C, 180 rpm/min until  $\text{OD}_{600}$  0.6~0.8. then The 1.0 mmol/L of IPTG was  
134 added to the Escherichia coli BL21 (DE3), and collecting 1 mL bacteria solution after  
135 inducing 2, 4, 6, 8, 10 h and overnight respectively. After centrifuging in 8000  
136 rpm/min for 15 min, these bacteria solution were detected by SDS-PAGE.

## 137 **2.8 Identification and purification of the expression of fusion protein**

138 The IPTG stimulation time of high expression was selected according to the  
139 results of the former. The bacterial solution was centrifuged in 8000 rpm/min for 15  
140 min, and the bacterial sedimentation was collected and suspended used PBS. The  
141 bacterial supernatant and precipitate after ultrasonic breakage (ice bath conditions)  
142 were purified, and precipitated by SDS-PAGE. Sure. The fusion protein was purified  
143 by staining with reference to Gao Shen Yang(Gao et al.,2010), and the size and purity  
144 of the purified protein were detected by SDS-PAGE.

## 145 **2.9 Preparation of anti ACE2 polyclonal antibody**

146 Male New Zealand White rabbits were immunized by subcutaneous injection to  
147 gain ACE2 antibody. Briefly, the ACE2 antigen mixed 1:1 with Freund's complete  
148 adjuvant was injected into rabbits, and booster injections were administered once  
149 at 10-days intervals with the same amount of antigen mixed 1:1 with incomplete

150 Freund's adjuvant. Serum was collected from heart method and stored at  $-80^{\circ}\text{C}$ .

## 151 **2.10 Extraction of total protein in pig and different species tissues**

152 The protein of heart, spleen, kidney, liver, duodenum, liver of pig, and also liver  
153 and kidney tissue of chicken were extracted from Roe. The protein concentration of  
154 each tissue was measured by BCA kit (Beyotime Biotechnology, China) .

## 155 **2.11 Indirect ELISA method for determination of polyclonal antibody titer of pig** 156 **ACE2**

157 The serum and pre immune serum of the rat were diluted by 1:50, 1:100, 1:200,  
158 1:400, 1:800, 1:1600, 1:3200, 1:6400, and then incubated in 96 well plate. After  
159 washing, Sheep anti rat marked by HRP were added. Finally, TMB was used as the  
160 substrate. The  $\text{OD}_{450}$  value of each well was read on the enzyme standard analyzer  
161 and pre immunized serum. As a negative control, the  $\text{OD}_{450}$  value was N, the serum  
162  $\text{OD}_{450}$  was P after immunization, and was positive by  $\text{P}/\text{N}>2.1$ .

## 163 **2.12 Westen-Blot detection of anti ACE2 antiserum specificity in rats**

164 After SDS-PAGE electrophoresis of the total tissue protein extracted from the  
165 ACE2 fusion protein and the proteins from former, the corresponding strips on the gel  
166 were transferred to the PVDF membrane, and the PVDF membrane was placed in the  
167 50 g/mL skimmed milk powder in 2 h at room temperature, and then transferred to the  
168 rat anti ACE2 blood albumin diluted with TBST 1:6400 times in overnight at  $4^{\circ}\text{C}$   
169 temperature, and the film was washed with a TBST liquid for 5 times. Then  
170 transferred to the Goat anti mouse IgG labeled with 1:5000 diluted horseradish  
171 enzyme in TBST solution, incubated at room temperature for 2 h and TBST washing  
172 solution for 5 times. After color rendering, the images were observed in the automatic  
173 chemiluminescence image analysis system.

## 174 **2.13 Immunofluorescent detection of anti ACE2 serum specificity**

175 The IPEC-J2 cells were cultured in 6 orifice plates with cell crawling slices.  
176 After being placed in  $37^{\circ}\text{C}$  and  $5\%\text{CO}_2$  incubators to 70% of fusion degree, After  
177 washing with PBS for 2 times, then 4% polyformaldehyde was used to fix 15 min,  
178 PBS was washed 5 times and permeated with 0.5%Triton 100 for 20 min, and then  
179 washed again, placed in the 50g/mL skimmed milk powder in 2 h at room temperature

180 and then transferred to rat anti ACE2 serum at 4°C incubated overnight. After  
181 washing with PBS for 5 times, transferring into the Goat anti rat IgG which diluted by  
182 PBS at 1:500 in 2 h at room temperature and washed for 5 times by PBS. The DAPI  
183 staining 5 min for 100 mg/mL, and PBS washing for 3 times, observed in a confocal  
184 microscope/ultrahigh resolution microscope STORM.

## 185 **2.14 Immunohistochemical identification and localization of murine anti ACE2** 186 **protein polyclonal antibody in pig tissues**

187 Immunohistochemical was performed on formalin-fixed tissue. Gut fragments,  
188 3×1 cm (7~10 cm away from the stomach), were flushed with water, bound in  
189 surgical tape and fixed in ice-cold 10% neutral buffered formalin for a maximum of  
190 14 h at 4°C. All fixed samples were embedded in paraffin and sectioned to 5 µm on  
191 poly L-lysine slides. Antigen retrieval was performed by boiling in citrate buffer  
192 (LabVision, Fremont, California, USA) for 10 min at 100°C. The endogenous  
193 peroxidase was blocked (only for immunohistochemical staining) by EnVision  
194 blocking solution (DakoCytomation, Glostrup, Denmark) for 5 min. The non-specific  
195 binding was blocked for 30 min with 5% rabbit serum (DakoCytomation) for the  
196 primary mouse serum(1:600), and primary antibody incubation was performed at 4°C  
197 overnight. The immunohistochemical detection was performed using secondary  
198 antibody horseradish peroxidase labelled polymer and DAB reagent (Dako  
199 Cytomation).

## 200 **3 RESULTS**

### 201 **3.1 Cloning and sequence analysis of the target gene of porcine ACE2**

202 4 reverse transcriptional products were randomly selected for PCR amplification.  
203 A single band was found in the spleen, duodenum, jejunum and ileum by 1% agarose  
204 gel electrophoresis (Line 1-4). The size of the strip was about 2400 bp, and was the  
205 same as expected (2418 bp) (Figure 1-A).

### 206 **3.2 The recombinant vector of PMD-19T-ACE 2 was successfully constructed**

207 In order to verify whether the ACE2 gene fragment was successfully inserted  
208 into the pMD19-T vector, 2 positive colonies were selected and the plasmid was



209 extracted by plasmid DNA, and 1% agarose gel electrophoresis results were found in  
210 figure 1-B. As can be seen from figure 1-B, 1 treaty 5110 bp bands were found after  
211 the Hind III single enzyme was cut, and the size was consistent with the sum of the  
212 pMD-19T vector (2692 bp) and the target gene (2418 bp). BamH I and Sac I double  
213 digestion showed about two bands around 2700 bp and 2400 bp, which confirmed that  
214 pMD-19T-ACE2 recombinant vector had been successfully constructed. The positive  
215 plasmid was selected and sent to Shanghai Ying Jun Biotechnology.

### 216 **3.3 Homology analysis of ACE2**

217 Using DNASTAR software, EditSeq template was used to analyze the coding  
218 region sequence and homology analysis of wild boar and other genes in Genbank.  
219 From Table 1, we can see that the nucleotide sequence obtained from this experiment  
220 is compared with the ACE2 nucleotide sequence of 2 pig species found on Genbank,  
221 and its homology is 99.5% and 99.1% respectively. Their homology with cattle, goats,  
222 domestic cats, domestic dogs, rhesus monkeys, humans and *Rattus norvegicus* were  
223 between 82.0%~90.0%, and the lowest homology with zebrafish was less than 50%.

224 According to the results of nucleotide sequencing, the corresponding amino acid  
225 sequence was conjectured. The piglet encodes 805 amino acids, which is consistent  
226 with the number of ACE2 amino acids in human and *Rattus norvegicus*, and an amino  
227 acid difference with cattle and sheep (804 amino acids).

### 228 **3.4 Homology analysis of ACE2**

229 Using the MegAlign module in DNASTAR software, the amino acid sequences  
230 derived from the cloned pig ACE2 nucleotide sequence and the amino acid sequences  
231 derived from wild boar and domestic pig ACE2 nucleotides were 99.3% and 98.5%,  
232 respectively, compared with the other species ACE2 amino acid sequences, and the  
233 results were compared with sheep, mountain cattle, domestic cats, domestic dogs,  
234 macaques, brown, brown, and brown. Homology of rodents, humans and alpacas  
235 reached over 80%, and the lowest homology with zebrafish was 46.8% (Fig. 2-A).  
236 From the tree of genetic evolution (Figure 52-B), the fragment is in the same  
237 evolutionary group with the ACE2 amino acid sequence of goats and cattle, and the  
238 zebrafish is in a completely different 2 branch, and the genetic evolution is consistent

239 with the evolution of amino acid.

### 240 **3.5 Structural Analysis of ACE2 protein**

241 The cross membrane region analysis of weaned piglets ACE2 protein was  
242 analyzed by TMHMM2.0 software. The results showed that the porcine ACE2 protein  
243 belonged to I type transmembrane protein, and the transmembrane types of ACE2  
244 proteins, such as people and sheep, were the same. Among them, part 1~739aa is the  
245 extracellular part, and there is a transmembrane helix between 740~762 aa, and the  
246 763~805 AA is the intracellular part (Fig. 3-A).

247 The Signal P4.1 software predicts the amino acids encoded by the pig ACE2  
248 gene. The results are as shown in figure 3-B: the C value at the frame is maximum,  
249 the S value is steep, and the Y value is the highest. It is predicted here that there is a  
250 potential cracking site between 17-18aa and the protein is secreted protein (this is  
251 judged by the value of D, D is the average value of S-mean and Y-max. It is important  
252 to distinguish whether the protein is secreted or not, the D value is 0.883, greater than  
253 that of 0.450--, which is the criterion for the secretion of protein. Through online  
254 SMART analysis (<http://smart.embl-heidelberg.de/>), the signal peptide region is  
255 between 1-17aa, which is consistent with the results predicted by the transmembrane  
256 region analysis.

### 257 **3.6 ACE2 protein has good hydrophilicity**

258 The hydrophilicity of ACE2 protein was analyzed according to the amino acid  
259 hydrophilic standard of Kyte-Doolittle. Results are shown in Figure 4. The proportion  
260 of hydrophilic region of ACE2 protein in piglets is larger, and the distribution is more  
261 uniform (more than 0 lines in the map), indicating that the protein has good  
262 hydrophilicity.

### 263 **3.7 Construction and identification of prokaryotic expression vectors**

264 After the recombinant plasmid and the expression vector were cut by BamH I  
265 and Sac I, the T4 DNA ligase was linked and transformed into E.coli BL21 (DE3),  
266 and the positive colony was picked up for PCR, and then the plasmid was identified  
267 by BamH I and double enzyme digestion. 1% agarose gel was used to detect the strain  
268 and about two bands. (Fig.5) the sequencing results were correct, indicating that

269 pET-32a-ACE2 recombinant plasmid was successfully constructed.

### 270 **3.8 Induced expression, identification and purification of recombinant protein**

271 The recombinant expression bacteria were induced and expressed at the final  
272 concentration of IPTG at 1 mmol/L. The expression products were collected at  
273 different time points. After SDS-PAGE analysis, the target protein was obtained in the  
274 induction of 2, 4, 6, 8, 10 h and overnight, and the expression of target protein was the  
275 highest when 10 h was induced (Figure 6-A). After ultrasonic breakage centrifugation,  
276 the supernatant and precipitation were taken respectively. After SDS-PAGE, the  
277 recombinant protein of ACE2 was found mainly in the precipitate, that is, in the form  
278 of inclusion body (Figure 6-B). The purified fusion protein (Fig 6-C) was purified and  
279 purified by KCl staining, which could be used for subsequent polyclonal antibody  
280 preparation.

### 281 **3.9 Determination of anti ACE2 polyclonal antibody titer by indirect ELISA** 282 **method**

283 The purified pET-32a-ACE2 fusion protein was immunized with 4 Wistar  
284 female rats. After 4 immunizations, the antibody test results were all positive, the rats  
285 were slaughtered, the isolated serum obtained the anti ACE2 antibody of the  
286 polyclonal mice, and the antiserum titer was detected by indirect ELISA method.  
287 Results as shown in Figure 7, the serum dilution ratio of the positive serum OD<sub>450</sub> was  
288 about 1, and the P/N value (P: the mean OD<sub>450</sub> value of the positive hole, the mean  
289 value of the negative pore, OD<sub>450</sub>) was the best serum dilution degree, that was 3200.

### 290 **3.10 Detection of serum specificity of anti ACE2 in rats by Western blot**

291 The rat anti ACE2 serum was prepared with the best multiple dilution as a single  
292 antibody, and the Sheep anti rat IgG-HRP was used as a two antibody. The purified  
293 fusion protein, pig heart, spleen, kidney, liver, duodenum, sheep liver, rat liver, rat  
294 liver and chicken liver and kidney tissue protein were analyzed by Western blot. The  
295 results showed the fusion protein and pig heart. There was a specific binding protein  
296 in the size of 100 kDa in the viscera, spleen, kidney, liver and duodenum (Fig. 8), and  
297 the rest did not appear. The results show that the ACE2 polyclonal antibody can  
298 identify the fusion protein and the ACE2 protein in the pig tissues, but the ACE2

299 protein in other species can not be combined, that is, the ACE2 polyclonal antibody  
300 against the pig's mouse has good immune response and specificity.

### 301 **3.11 Anti ACE2 serum specificity in mice by immunofluorescent**

302 The mouse anti ACE2 serum was diluted by multiple 1:600 as one antibody, the  
303 fluorescent enzyme labeled Sheep anti mouse IgG-HRP was two resistance, and the  
304 final concentration was 100 ng/mL DAPI for 5 minutes. The immunofluorescence  
305 analysis of the pig intestinal epithelial cells, as shown in Figure 9, that the mouse anti  
306 ACE2 could specifically identify the ACE on the membrane of the pig small intestinal  
307 epithelial cells. The 2 protein, that is, the polyclonal antibody of pig anti mouse ACE2  
308 prepared, has better immunoreactivity.

### 309 **3.12 Serum sensitivity of anti ACE2 in rats by Western blot**

310 As shown in Figure 10, the proteins extracted from pig spleen, kidney, liver, lung,  
311 pancreas, lymph node, stomach, duodenum, jejunum, ileum, colon, rectum and cecum  
312 were analyzed by Western blotting, and the rat anti porcine polyclonal antibody was  
313 diluted with 1: 3200 as one resistance, and the IgG of sheep resistant to HRP was two.  
314 Resistance, the results showed that the tissue protein extracted from pig kidney,  
315 jejunum and rectum had obvious bands at 92 kDa, and the highest content in kidney,  
316 but not in other tissues. Under the same condition, the Sheep anti rabbit polyclonal  
317 antibody was diluted with 1:1000 multiple as a single antibody, and the HRP labeled  
318 Goat anti rabbit IgG was two. The results showed that the tissue protein extracted  
319 from pig spleen, kidney, lung, pancreas, lymph node, stomach, duodenum, jejunum,  
320 ileum, colon, rectum, and cecum was marked at 92 kDa. The results showed that the  
321 sensitivity of mouse against polyclonal antibody was poor.

### 322 **3.13 Immunohistochemistry was used to detect the expression of ACE2 in pig** 323 **tissues.**

324 The cellular localization of ACE2 in porcine tissues was analyzed after dilution  
325 of 1:600 prepared by anti ACE2 serum. The criterion is that if Brown is positive, the  
326 result is shown in Fig. 11. As can be seen from figure 3-21, ACE2 protein exists in  
327 various tissues and organs of the pig, mainly expressed in the mucosa of the gastric  
328 fundus (Fig. 11-A), the myometrium of the small intestine, serous layer, and villi

329 epithelium (FIGS. 11-B, C, D). In the large intestine, it is mainly expressed in the  
330 intestinal gland (FIGS. 11-E, F), and the result of this group on the pig WB Like. The  
331 results further confirmed the specificity of the mouse anti ACE2 polyclonal antibody  
332 prepared in this experiment.

## 333 **4 DISCUSSION**

334 In 2000, Tipnis amplified the genes encoding ACE2 from the cDNA Library of  
335 human lymphoid cancer(Tipnis et al., 2000). It was named as ACEH and numbered as  
336 AF241254 in the gene pool. Further study found that the open reading frame of cDNA  
337 of the ACEH was composed of 2418 nucleotides, encoding 805 amino acids, and the  
338 gene was located at the chromosome Xp22 site and contains 18 exons. In the same  
339 year, Donoghue et.al constructed a full-length ACE2 expression vector from the  
340 cDNA Library of heart failure patients through transfection of CHO cells(Donoghue  
341 et al., 2000). The gene sequence was recorded by GenBank and numbered as  
342 AF291820. Later, it was confirmed that ACE2 and ACEH were the same. In 2003,  
343 Moore confirmed that ACE2 was the main functional receptor of the SARS  
344 coronavirus(Li et al., 2003). In order to further understand the route of infection, Li  
345 cloned the full-length ACE2 sequence of the beaver, and confirmed that the beaver  
346 was infected mainly by the S protein region of the SARS coronavirus combined with  
347 its ACE2(Ge et al., 2013; Li et al., 2005). Wang extracted the total RNA from the  
348 lungs of 9 month old cats and amplified the ACE2 gene sequence of the home cat by  
349 RT-PCR(Wang et al. 2005). The gene number in Genebank was AY957464 and its  
350 sequence size was 2418 bp. It encodes 805 amino acids. It was suggested that cat  
351 ACE2 might be more likely to mediate the invasion of SARS-CoV. In 2005, Xie  
352 successfully amplified the full length cDNA sequence of the ACE2 gene from the  
353 mouse kidney tissue, and the sequence size was 2418 bp(Xie et al., 2005). Then Xu  
354 uploaded the partial ACE2 gene sequence of kidney of *Trionyx sinensis* (Genbank:  
355 HM107424) (Xu et al., 2011). In 2018 Chen cloned the whole ACE2 gene sequence  
356 from the kidney and lung of monkeys. Compared with the human ACE2 sequence,  
357 there were 38 NS mutations(Chen et al., 2008). The specific fragment of the ACE2

358 gene coding region of the goat kidney tissue was amplified by Yang in the laboratory  
359 for the first time. The length of the nucleotide sequence was 2415 bp(Yang et al.,  
360 2016).

361 In this study, the pig ACE2 gene was cloned, analyzed and prokaryotic expressed  
362 successfully, and the polyclonal antibody of mouse ACE2 was prepared. The whole  
363 gene sequence of ACE2 in pig was 2418 bp and 805 amino acids were encoded.  
364 Homology analysis on GenBank found that the cloned ACE2 gene were above 99%  
365 similar to other porcine ACE2 genes, which shows that the pig ACE2 gene cloning  
366 was successful. The full-length gene sequence of pig ACE2 gene was provided to  
367 GenBank database., It is deduced that the pig ACE2 protein belongs to the type I  
368 secretory transmembrane protein and its signal peptide sequence is located between  
369 1~17 AA, which is similar to that of goats (1~18 AA) (Yang et al., 2016).

370 In conclusion, In this paper, the basic information of porcine ACE2 protein was  
371 provided and the specific anti-porcine polyclonal antibody was successfully, which  
372 could lay the foundation for further research on the biological activity of ACE2 in  
373 pigs.

#### 374 **ACKNOWLEDGMENTS**

375 This work was supported by the National Natural Science Foundation of China  
376 (31972640).

#### 377 **CONFLICT OF INTEREST**

378 The authors declare no conflict of interest.

## 379 REFERENCES

- 380 1. Briones, AM, & Touyz, RM. (2010) Oxidative stress and hypertension: current  
381 concepts. *Current hypertension reports*, 12(2), 135-142.
- 382 2. Chen, Y, Liu, L, Wei, Q, Zhu, H, Jiang, H, Tu, X, Chen, Z et al. (2008) Rhesus  
383 angiotensin converting enzyme 2 supports entry of severe acute respiratory  
384 syndrome coronavirus in Chinese macaques. *Virology*, 381(1), 89-97.
- 385 3. Danilczyk, U, Sarao, R, Remy, C, Benabbas, C, Stange, G, Richter, A, Makrides,  
386 V et al.(2006). Essential role for collectrin in renal amino acid  
387 transport. *Nature*, 444(7122), 1088.
- 388 4. Donoghue, M, Hsieh, F, Baronas, E, Godbout, K, Gosselin, M, Stagliano, N,  
389 Breitbart, RE et al. (2000) A novel angiotensin-converting enzyme-related  
390 carboxypeptidase (ACE2) converts angiotensin I to angiotensin 1-9. *Circulation*  
391 *research*, 87(5), e1-e9.
- 392 5. Hashimoto, T, Perlot, T, Rehman, A, Trichereau, J, Ishiguro, H, Paolino, M, Wild,  
393 B et al. (2012) ACE2 links amino acid malnutrition to microbial ecology and  
394 intestinal inflammation. *Nature*, 487(7408), 477.
- 395 6. Imai, Y, Kuba, K, Rao, S, Huan, Y, Guo, F, Guan, B, Crackower, MA et al.  
396 (2005) Angiotensin-converting enzyme 2 protects from severe acute lung  
397 failure. *Nature*, 436(7047), 112.
- 398 7. Gao, SY, Zha, EH, Wang, S, Zhou, TZ, Hui, L et al. (2010) A  
399 'cost-effective' method for purification of prokaryotic expression proteins in gel  
400 slices. *CHINESE AGR SCI BULL*, 26, 24-26.
- 401 8. Ge, XY, Li, JL, Yang, XL, Chmura, AA, Zhu, G, Epstein, JH, Zhang, YJ et al.  
402 (2013) Isolation and characterization of a bat SARS-like coronavirus that uses the  
403 ACE2 receptor. *Nature*, 503(7477), 535.
- 404 9. Li, W, Moore, MJ, Vasilieva, N, Sui, J, Wong, SK, Berne, MA, Choe, H et al.  
405 (2003). Angiotensin-converting enzyme 2 is a functional receptor for the SARS  
406 coronavirus. *Nature*, 426(6965), 450.
- 407 10. Li, W, Zhang, C, Sui, J, Kuhn, JH, Moore, MJ, Luo, S et al. (2005) Receptor and  
408 viral determinants of SARS-coronavirus adaptation to human ACE2. *The EMBO*  
409 *journal*, 24(8), 1634-1643.
- 410 11. Lambert, DW, Clarke, NE, & Turner, AJ. (2010) Not just angiotensinases: new  
411 roles for the angiotensin-converting enzymes. *Cellular and molecular life*  
412 *sciences*, 67(1), 89-98.

- 413 12. Pei, Z, Meng, R, Li, G, Yan, G, Xu, C, Zhuang, Z, et al. (2010) Angiotensin-(1-7)  
414 ameliorates myocardial remodeling and interstitial fibrosis in spontaneous  
415 hypertension: role of MMPs/TIMPs. *Toxicology letters*, 199(2), 173-181.
- 416 13. Tipnis, SR, Hooper, NM, Hyde, R, Karran, E, Christie, G, et al. (2000) A Human  
417 Homolog of Angiotensin Converting Enzyme-Cloning and Functional Expression  
418 As A Captopril Insensitive Carboxypeptidase. *Journal of Biological Chemistry*,  
419 2000, 275(43): 33238-33243.
- 420 14. Wang, LP, Fan, SJ, Li, SM, Wang, XJ, Gao, JL, et al. (2016) Protective role of  
421 ACE2-Ang-(1-7)-Mas in myocardial fibrosis by downregulating K Ca 3.1  
422 channel via ERK1/2 pathway. *Pflügers Archiv-European Journal of*  
423 *Physiology*, 468(11-12), 2041-2051.
- 424 15. WANG, C, TAN, YD, GUO, AZ, & CHEN, HC. (2005) Domestic Cat ACE2  
425 Gene Cloning, Sequencing and Bioinformatic Analysis. *Wuhan University*  
426 *Journal (Natural Science Edition)*, 6, 018.
- 427 16. Xie X, Chen J, Wang X, et al. (2005) Cloning, expression and sequence analysis  
428 and tissue distribution of angiotensin-converting enzyme 2 (ACE2) gene in adult  
429 mice[J]. *J Zhejiang Univ(Med Sci)*, (01): 51-57.
- 430 17. Xu C, S, Yao Y, L, Yang P. (2011) Cloning and genetic Evolution Analysis of  
431 ACE2 Gene in Kidney of *Trionyx sinensis* [J]. *Livestock and Veterinary*  
432 *Medicine*, 43 (04): 22-25.
- 433 18. Yang C, Yang X, Lackeyram D. (2016) Expression of apical Na<sup>+</sup>-1 -glutamine  
434 co-transport activity, B0 -system neutral amino acid co-transporter (B 0 AT1) and  
435 angiotensin-converting enzyme 2 along the jejunal crypt-villus axis in young pigs  
436 fed a liquid formula [J]. *Amino Acids*, 48(6): 1491-1508.
- 437 19. Zhang W, Miao, JF, Wang, YX, et al. (2012) Cloning of ACE2 gene of Suzhong  
438 pigs and its phylogenetic analysis. *Jiangsu Journal of Agricultural Sciences*, 1,  
439 015.



## 440 **FIGURE LEGENDS**

### 441 **Figure 1.** ACE2 gene sequencing.

442 A: The product of PCR amplification of ACE2 gene; M: DL 5000, Line 0: negatively control, Line 1: ACE2 in  
443 spleen; Line 2: ACE2 in duodenum; Line 3: ACE2 in jejunum; Line 4: ACE2 in ileum; B: Single and double  
444 enzyme digestion of recombinant plasmid. Line 0: negative control; Line 1: Recombinant plasmid  
445 ACE2-pMD19T; Line 2: Recombinant plasmid was digested by Hind III; Line 3: Recombinant plasmid was  
446 digested by BamHI and SacI.

### 447 **Figure 2.** Homology / phylogenetic tree analysis of ACE2 protein.

448 A: Comparison of the deduced amino acid sequences between different species of ACE2; B: Phylogenetic tree of  
449 the deduced amino acid sequence of ACE2 nucleotide sequences between different species.

### 450 **Figure 3.** Prediction of transmembrane domain /signal peptide analysis of ACE2 protein from 451 piglet.

452 A: Prediction of transmembrane domain; B: signal peptide analysis.

### 453 **Figure 4.** Hydrophilic analysis of ACE2 protein in piglet.

### 454 **Figure 5.** Development of prokaryotic expression construction of ACE2.

455 M<sub>1</sub>: DL10000; Line 1: Recombinant plasmid; Line 2: Recombinant plasmid was digested by Hind III; Line 3:  
456 Recombinant plasmid was digested by BamHI and SacI.

### 457 **Figure 6.** Expression Purification of pET-32a-ACE2 fusion protein.

458 A: Induced expression of pET-32a-ACE2 in E:coli BL21(DE3); M: Protein molecular weight Marker; Line 1~7:  
459 Recombinant pET-32a-ACE2 expression products in E:coli BL21(DE3) induced with IPTG at 0、2、4、6、8、10  
460 and overnight; B: Solubility analysis of pET-32a-ACE2 fusion protein; M: Protein molecular weight Marker; Line  
461 1: Recombinant bacterium; Line 2: The supernatant; Line 3: The deposit; C: Purification of pET-32a-ACE2 fusion  
462 protein; M: Protein molecular weight Marker; Line 1 : Recombinant bacterium; Line 2~3: Purified fusion  
463 protein.

### 464 **Figure 7.** ELISA detection of rats anti-ACE2 titer.

### 465 **Figure 8.** Western blotting analysis of specificity of polyclonal antibody.

466 A: Western blotting analysis of purified protein; M: Protein molecular weight Marker; Line 1~2: purified protein;  
467 B: Western blotting analysis of purified protein of different tissue proteins; M: Protein molecular weight Marker;  
468 Line 1: Cardiac tissue protein of porcine; Line 2: Spleen tissue protein of porcine; Line 3: Duodenum tissue  
469 protein of porcine; Line 4: Kidney tissue protein of porcine; Line 5: Liver tissue protein of porcine; Line 6: Liver  
470 tissue protein of goat; Line 7: Liver tissue protein of rat; Line 8: Liver tissue protein of chicken; Line 9: Kidney

471 tissue protein of chicken.

472 **Figure 9.** Immunofluorescence analysis of specificity of polyclonal antibody.

473 **Figure 10.** Western blotting analysis of differert tissues from porcine.

474 Line 1: Live tissue protein of porcine; Line 2: Spleen tissue protein of porcine; Line 3: lymph tissue protein of  
475 porcine; Line 4: stomach tissue protein of porcine; Line 5: duodenum tissue protein of porcine; Line 6: jejunum  
476 tissue protein of porcine; Line 7: ileum tissue protein of porcine; Line 8: colon tissue protein of porcine; Line 9:  
477 rectum tissue protein of porcine; Line 10: caecum tissue protein of porcine; Line 11: lung tissue protein of porcine;  
478 Line 12: kindey tissue protein of porcine; Line 13: pancreas tissue protein of porcine.

479 **Figure 11.** ACE2 immunohistochemical map of differert tissues from pigs.

## Table

Table 1 Comparison of nucleic acid homology between the piglet and other organisms

| Species                | GenBank accession No. | Homology (%) |
|------------------------|-----------------------|--------------|
| Sus scrofa             | NM_001123070.1        | 99.5         |
| Sus scrofa domestica   | GQ262781.1            | 99.1         |
| Bos taurus             | NM_001024502.4        | 88.8         |
| Felis catus            | NM_001039456.1        | 87.4         |
| Canis lupus familiaris | NM_001165260.1        | 86.6         |
| Rattus norvegicus      | NM_001012006.1        | 82.0         |
| Macaca mulatta         | FJ170098.1            | 84.8         |
| Capra hircus           | NM_001290107.1        | 89.2         |
| Danio rerio            | NM_001007297.1        | 49.7         |
| Homo sapiens           | NM_021804.2           | 84.9         |

## FIGURE LEGENDS

### Figure 1. ACE2 gene sequencing.

A: The product of PCR amplification of ACE2 gene; M: DL 5000, Line 0: negatively control, Line 1: ACE2 in spleen; Line 2: ACE2 in duodenum; Line 3: ACE2 in jejunum; Line 4: ACE2 in ileum; B: Single and double enzyme digestion of recombinant plasmid. Line 0: negative control; Line 1: Recombinant plasmid ACE2-pMD19T; Line 2: Recombinant plasmid was digested by Hind III; Line 3: Recombinant plasmid was digested by BamHI and SacI.

### Figure 2. Homology / phylogenetic tree analysis of ACE2 protein.

A: Comparison of the deduced amino acid sequences between different species of ACE2; B: Phylogenetic tree of ACE2 protein from different species.

bioRxiv preprint doi: <https://doi.org/10.1101/2020.03.12.988634>; this version posted March 12, 2020. The copyright holder for this preprint (which was not certified by peer review) is the author/funder, who has granted bioRxiv a license to display the preprint in perpetuity. It is made available under aCC-BY 4.0 International license.

### Figure 3. Prediction of transmembrane domain /signal peptide analysis of ACE2 protein from piglet.

A: Prediction of transmembrane domain; B: signal peptide analysis.

### Figure 4. Hydrophilic analysis of ACE2 protein in piglet.

### Figure 5. Development of prokaryotic expression construction of ACE2.

M<sub>1</sub>: DL10000; Line 1: Recombinant plasmid; Line 2: Recombinant plasmid was digested by Hind III; Line 3: Recombinant plasmid was digested by BamHI and SacI.

### Figure 6. Expression Purification of pET-32a-ACE2 fusion protein.

A: Induced expression of pET-32a-ACE2 in E:coli BL21(DE3); M: Protein molecular weight Marker; Line 1~7: Recombinant pET-32a-ACE2 expression products in E:coli BL21(DE3) induced with IPTG at 0、 2、 4、 6、 8、 10 and overnight; B: Solubility analysis of pET-32a-ACE2 fusion protein; M: Protein molecular weight Marker; Line 1: Recombinant bacterium; Line 2: The supernatant; Line 3: The deposit; C: Purification of pET-32a-ACE2 fusion protein; M: Protein molecular weight Marker; Line 1 : Recombinant bacterium; Line 2~3: Purified fusion protein.

### Figure 7. ELISA detection of rats anti-ACE2 titer.

### Figure 8. Western blotting analysis of specificity of polyclonal antibody.

A: Western blotting analysis of purified protein; M: Protein molecular weight Marker; Line 1~2: purified protein; B: Western blotting analysis of purified protein of different tissue proteins; M: Protein molecular weight Marker; Line 1: Cardiac tissue protein of porcine; Line 2: Spleen tissue protein of porcine; Line 3: Duodenum tissue protein of porcine; Line 4: Kidney tissue protein of porcine; Line 5: Liver tissue protein of porcine; Line 6: Liver tissue protein of goat; Line 7: Liver tissue protein of rat; Line 8: Liver tissue protein of chicken; Line 9: Kidney

tissue protein of chicken.

**Figure 9.** Immunofluorescence analysis of specificity of polyclonal antibody.

**Figure 10.** Western blotting analysis of different tissues from porcine.

Line 1: Live tissue protein of porcine; Line 2: Spleen tissue protein of porcine; Line 3: lymph tissue protein of porcine; Line 4: stomach tissue protein of porcine; Line 5: duodenum tissue protein of porcine; Line 6: jejunum tissue protein of porcine; Line 7: ileum tissue protein of porcine; Line 8: colon tissue protein of porcine; Line 9: rectum tissue protein of porcine; Line 10: caecum tissue protein of porcine; Line 11: lung tissue protein of porcine; Line 12: kidney tissue protein of porcine; Line 13: pancreas tissue protein of porcine.

**Figure 11.** ACE2 immunohistochemical map of different tissues from pigs.

bioRxiv preprint doi: <https://doi.org/10.1101/2020.03.12.988634>; this version posted March 12, 2020. The copyright holder for this preprint (which was not certified by peer review) is the author/funder, who has granted bioRxiv a license to display the preprint in perpetuity. It is made available under aCC-BY 4.0 International license.

**Figure 1**

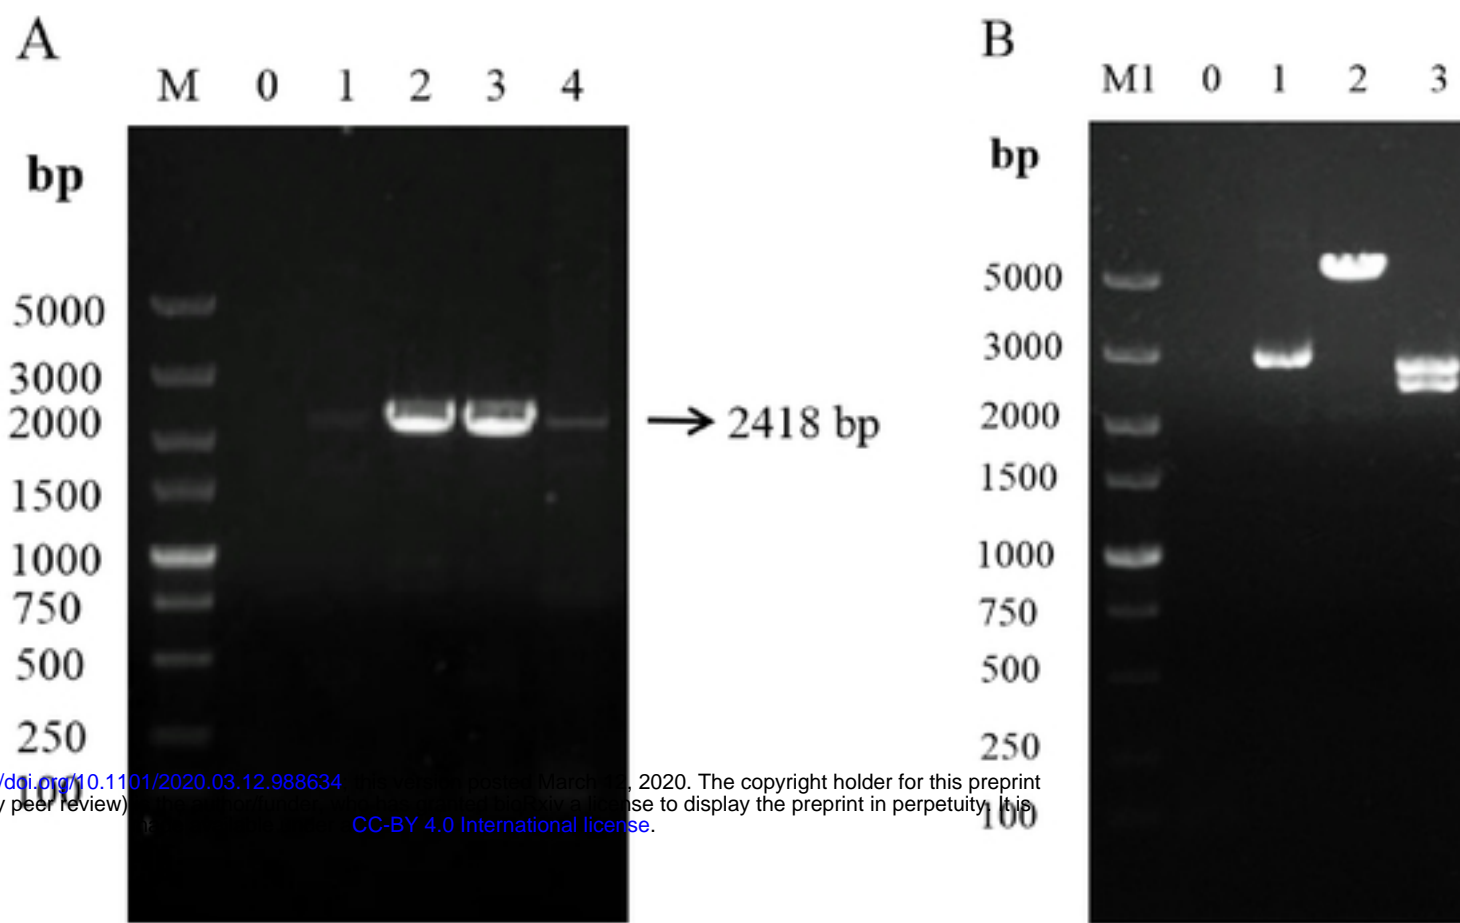

bioRxiv preprint doi: <https://doi.org/10.1101/2020.03.12.988634>; this version posted March 12, 2020. The copyright holder for this preprint (which was not certified by peer review) is the author/funder, who has granted bioRxiv a license to display the preprint in perpetuity. It is made available under aCC-BY 4.0 International license.

**Figure 2**

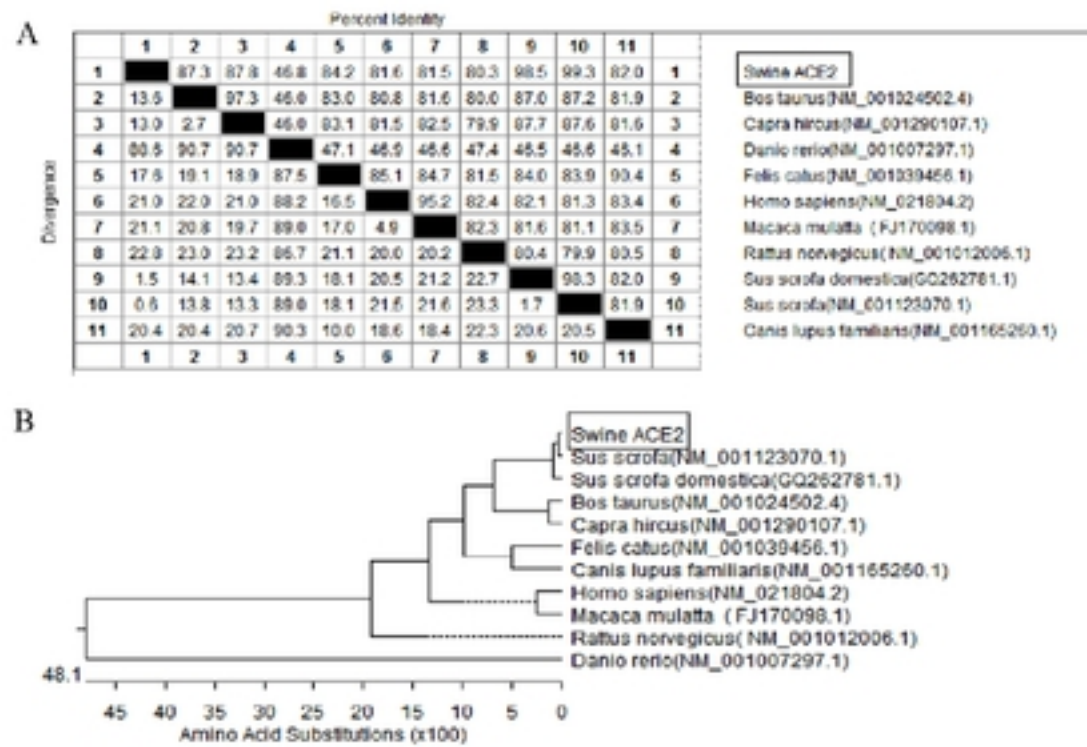

**Figure 3**

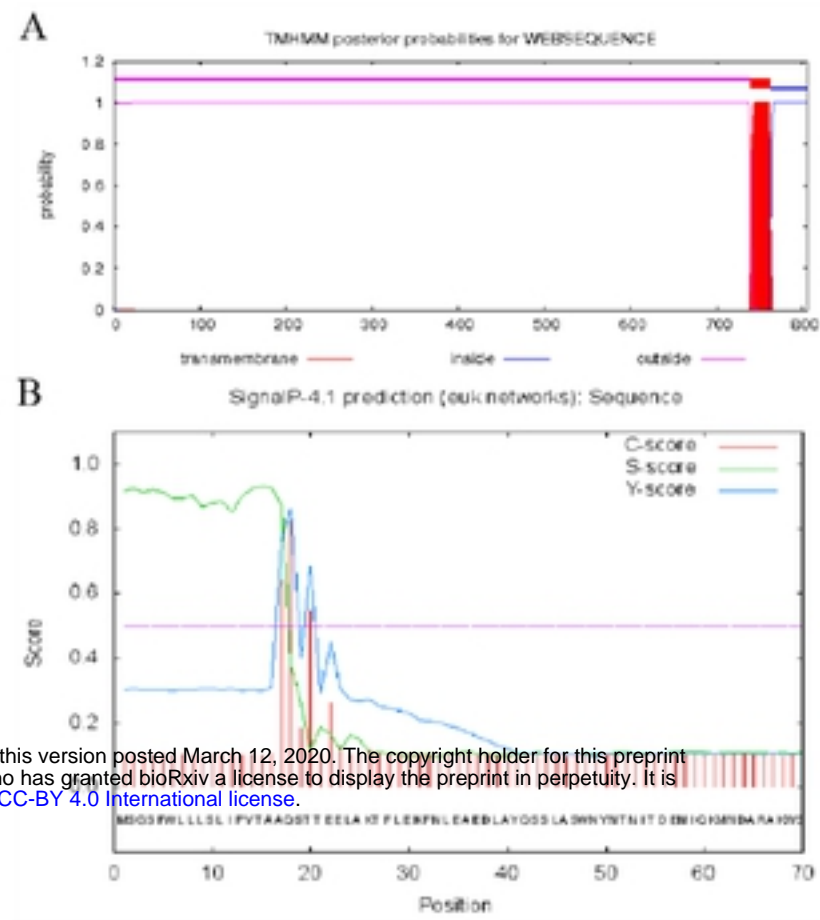

bioRxiv preprint doi: <https://doi.org/10.1101/2020.03.12.988634>; this version posted March 12, 2020. The copyright holder for this preprint (which was not certified by peer review) is the author/funder, who has granted bioRxiv a license to display the preprint in perpetuity. It is made available under aCC-BY 4.0 International license.

**Figure 4**

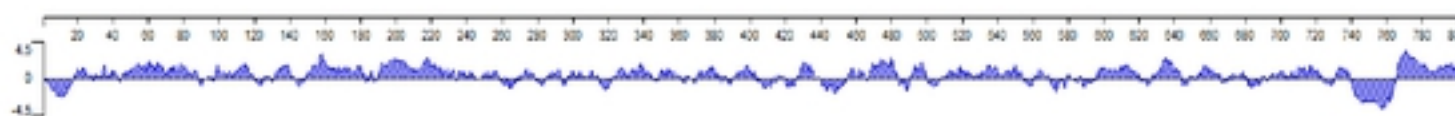

bioRxiv preprint doi: <https://doi.org/10.1101/2020.03.12.988634>; this version posted March 12, 2020. The copyright holder for this preprint (which was not certified by peer review) is the author/funder, who has granted bioRxiv a license to display the preprint in perpetuity. It is made available under aCC-BY 4.0 International license.



**Figure 5**

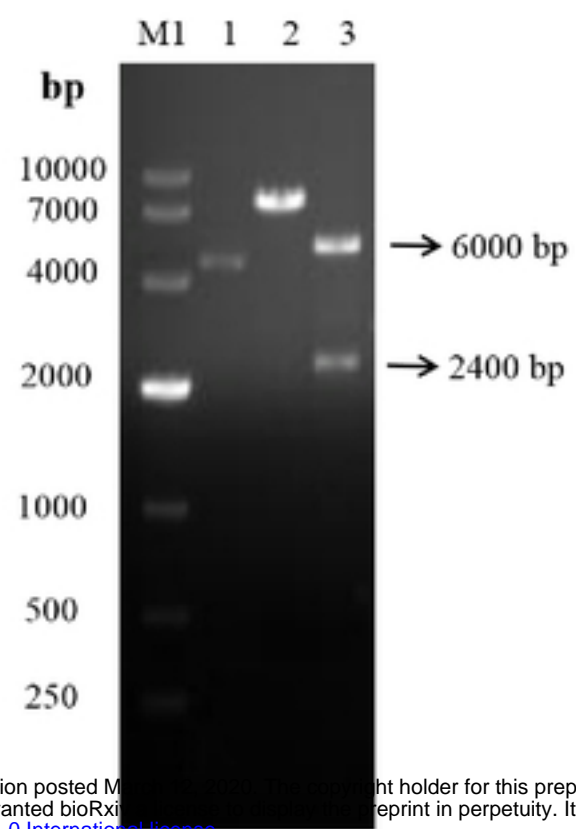

bioRxiv preprint doi: <https://doi.org/10.1101/2020.03.12.988634>; this version posted March 12, 2020. The copyright holder for this preprint (which was not certified by peer review) is the author/funder, who has granted bioRxiv a license to display the preprint in perpetuity. It is made available under aCC-BY 4.0 International license.

**Figure 6**

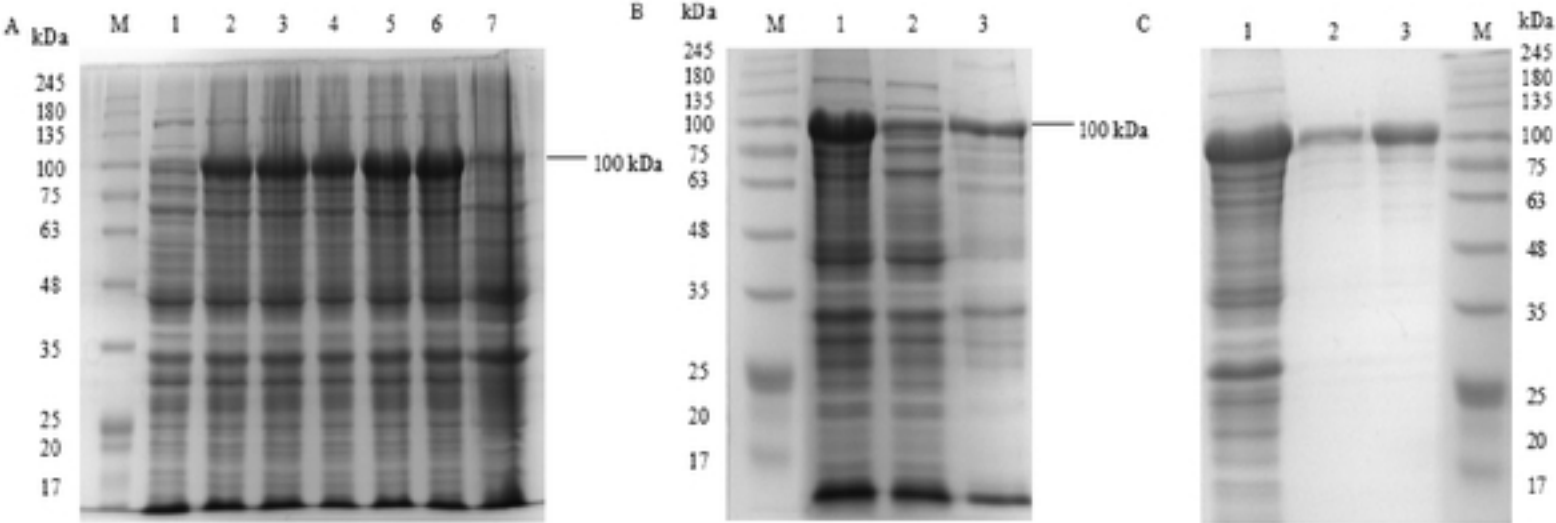

bioRxiv preprint doi: <https://doi.org/10.1101/2020.03.12.988634>; this version posted March 12, 2020. The copyright holder for this preprint (which was not certified by peer review) is the author/funder, who has granted bioRxiv a license to display the preprint in perpetuity. It is made available under aCC-BY 4.0 International license.

Figure 7

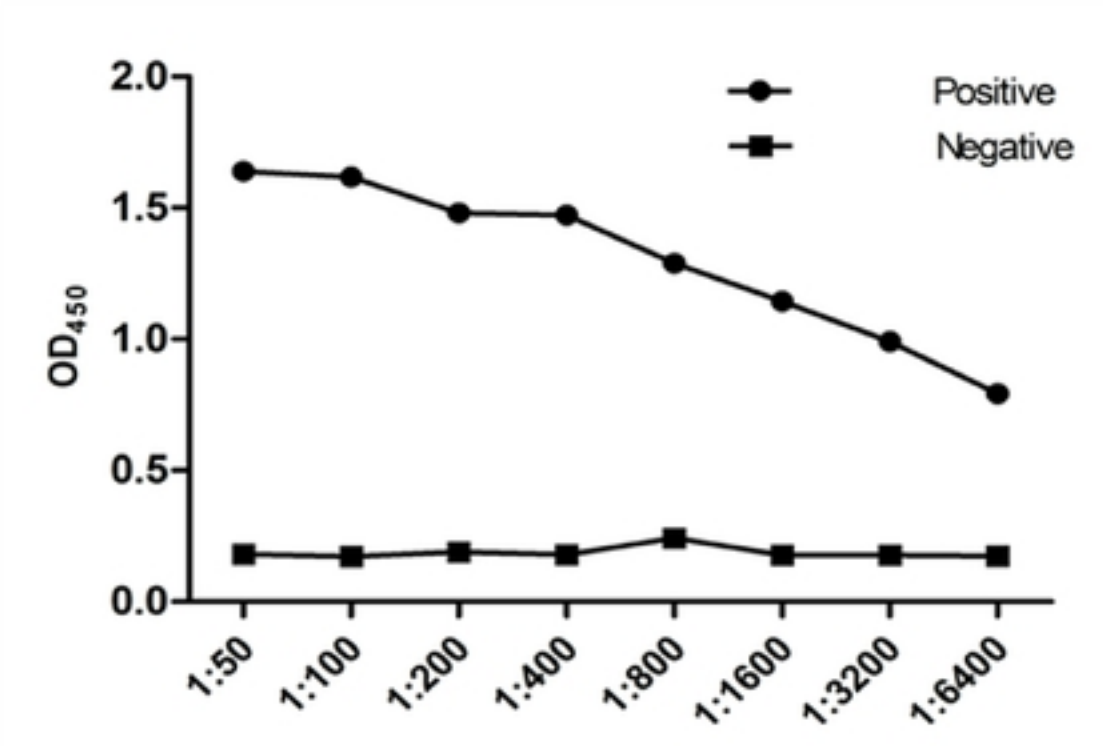

bioRxiv preprint doi: <https://doi.org/10.1101/2020.03.12.988634>; this version posted March 12, 2020. The copyright holder for this preprint (which was not certified by peer review) is the author/funder, who has granted bioRxiv a license to display the preprint in perpetuity. It is made available under aCC-BY 4.0 International license.

**Figure 8**

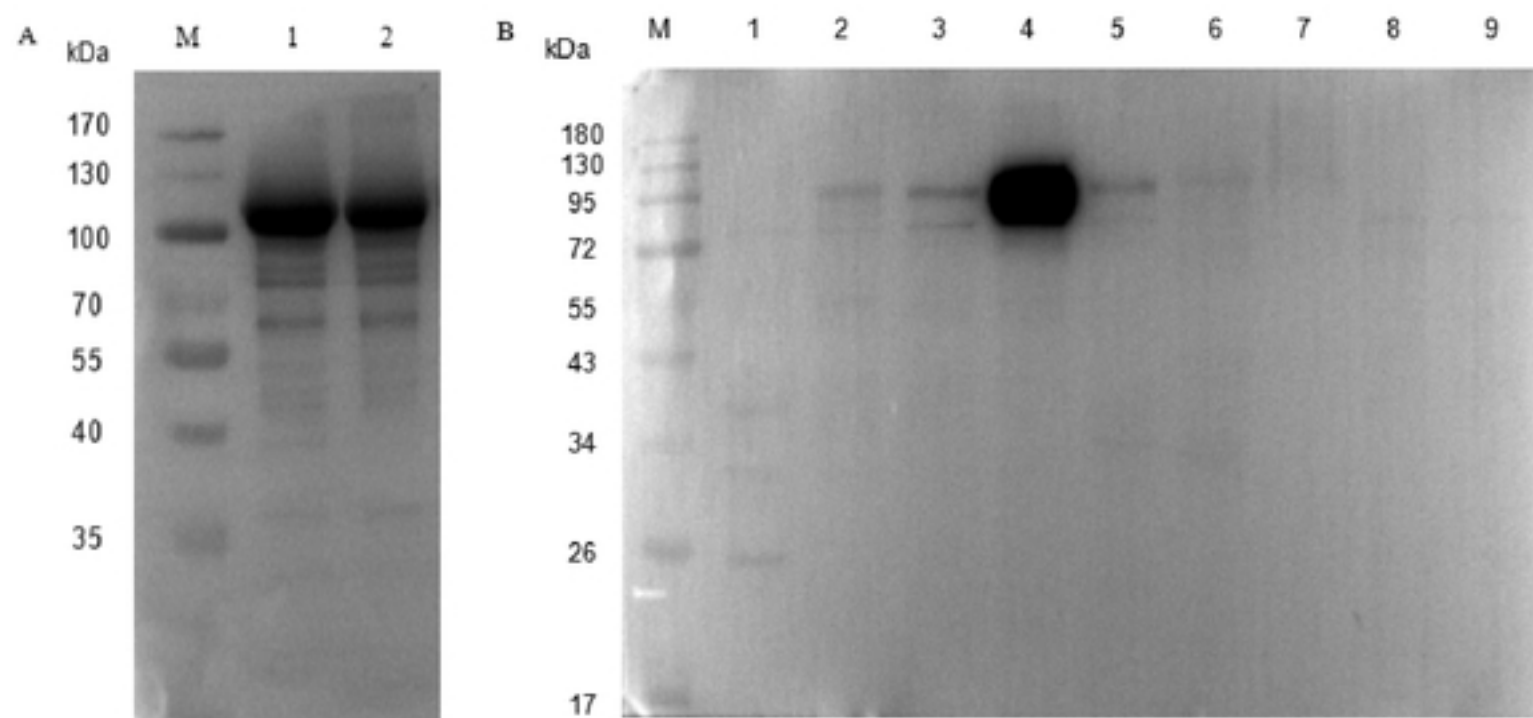

bioRxiv preprint doi: <https://doi.org/10.1101/2020.03.12.988634>; this version posted March 12, 2020. The copyright holder for this preprint (which was not certified by peer review) is the author/funder, who has granted bioRxiv a license to display the preprint in perpetuity. It is made available under aCC-BY 4.0 International license.

**Figure 9**

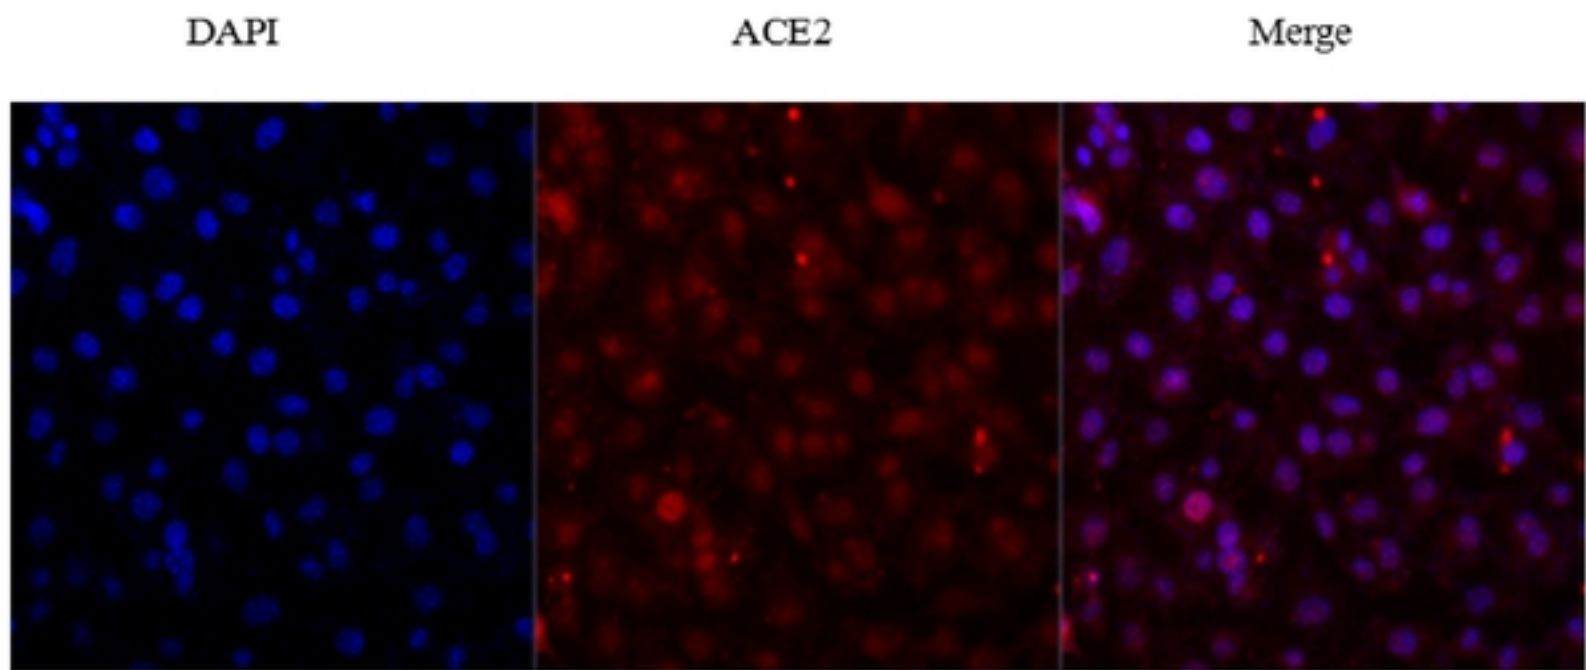

bioRxiv preprint doi: <https://doi.org/10.1101/2020.03.12.988634>; this version posted March 12, 2020. The copyright holder for this preprint (which was not certified by peer review) is the author/funder, who has granted bioRxiv a license to display the preprint in perpetuity. It is made available under aCC-BY 4.0 International license.

**Figure 10**

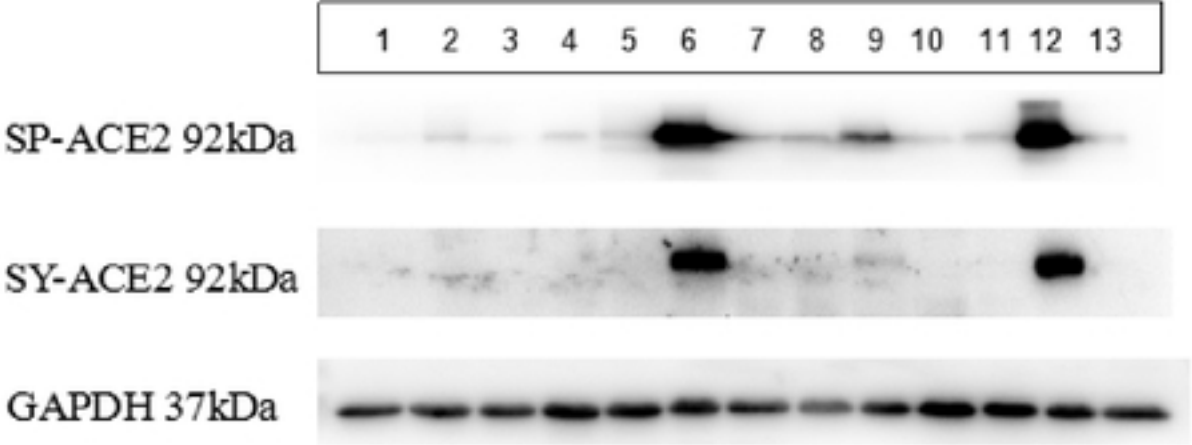

bioRxiv preprint doi: <https://doi.org/10.1101/2020.03.12.988634>; this version posted March 12, 2020. The copyright holder for this preprint (which was not certified by peer review) is the author/funder, who has granted bioRxiv a license to display the preprint in perpetuity. It is made available under aCC-BY 4.0 International license.

**Figure 11**

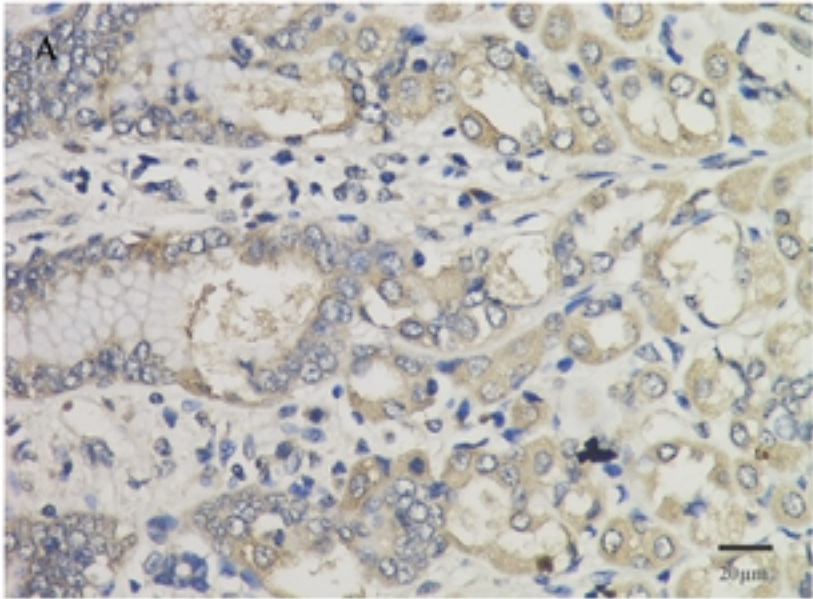

**Fundic (400×)**

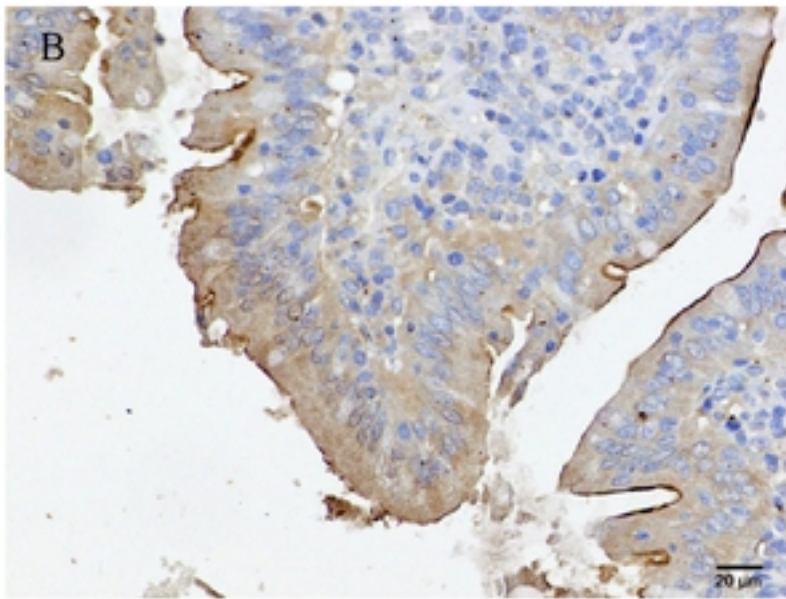

**Duodenum (400×)**

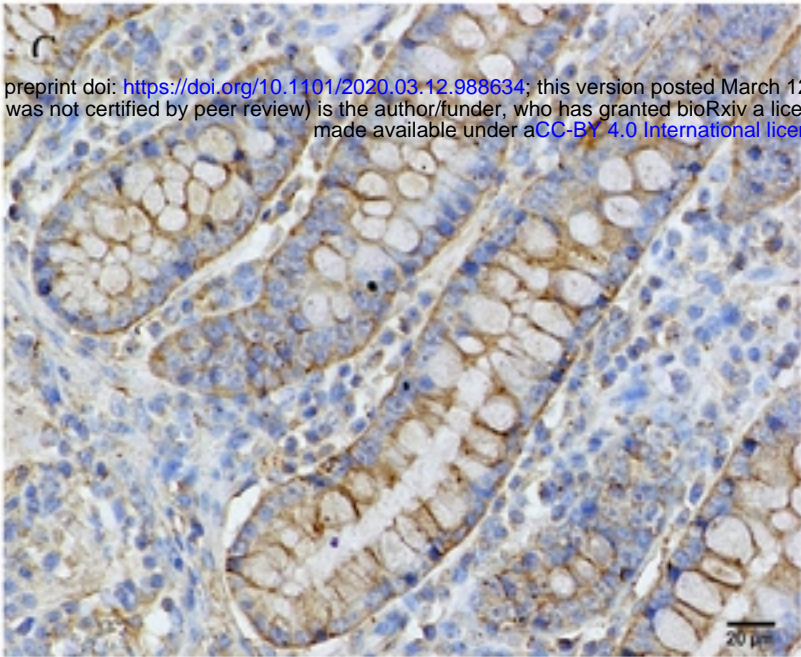

**Jejunum (400×)**

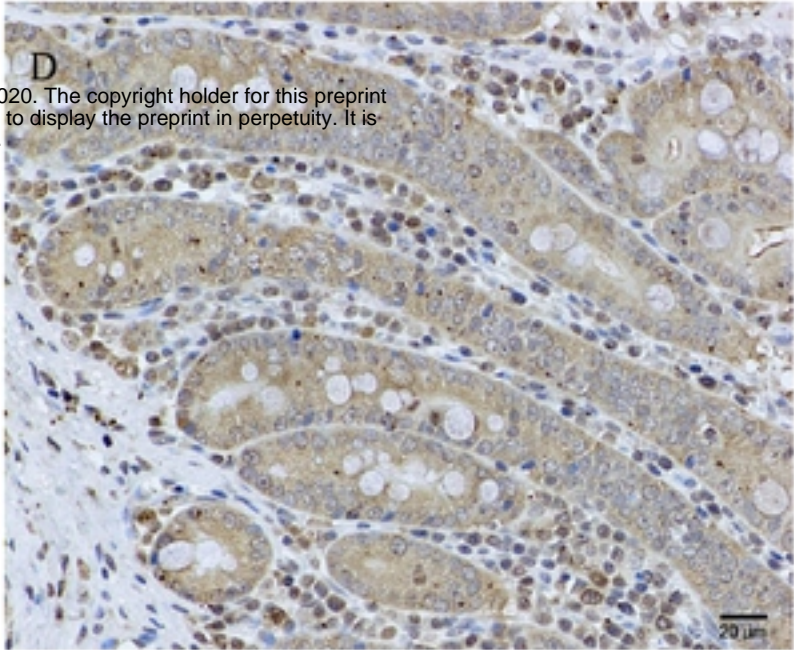

**Ileum (400×)**

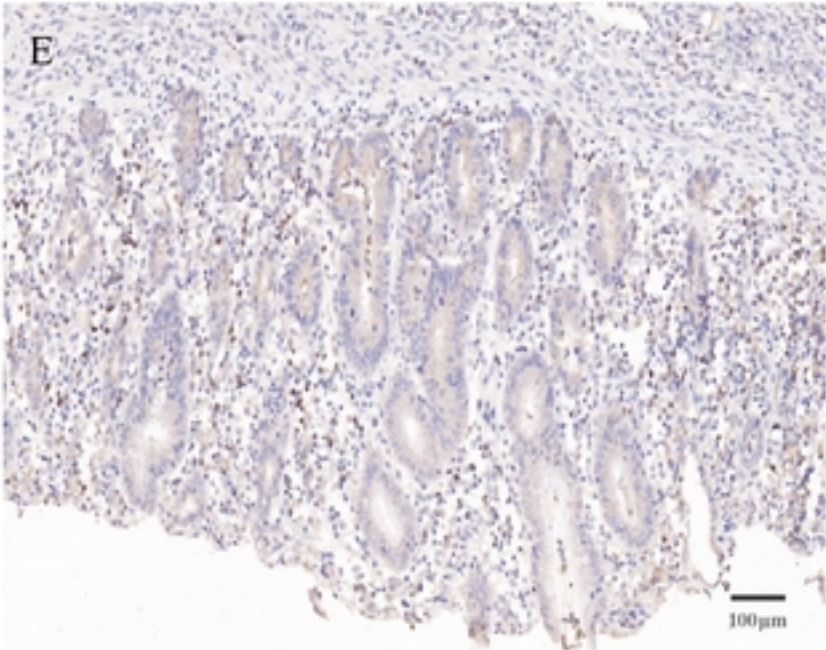

**Colon (100×)**

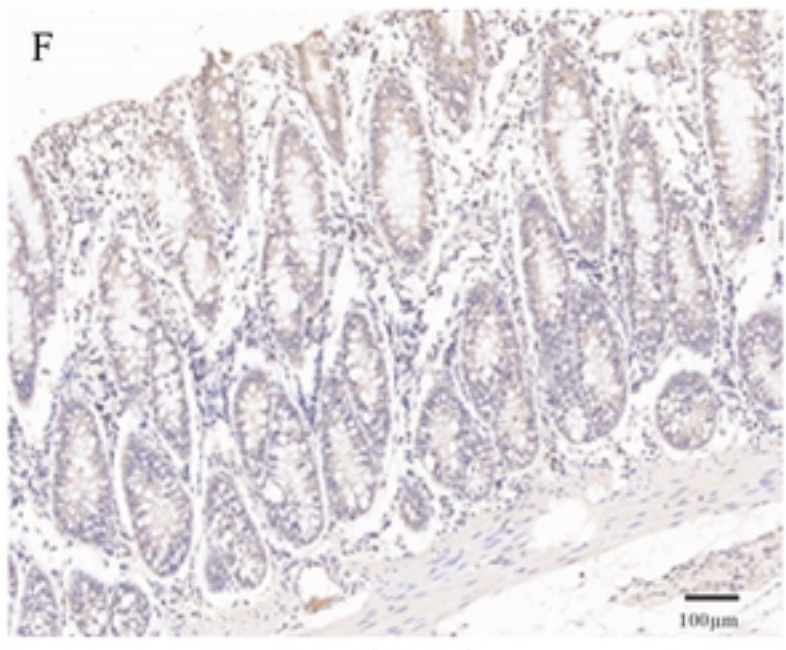

**Rectum (100×)**

bioRxiv preprint doi: <https://doi.org/10.1101/2020.03.12.988634>; this version posted March 12, 2020. The copyright holder for this preprint (which was not certified by peer review) is the author/funder, who has granted bioRxiv a license to display the preprint in perpetuity. It is made available under aCC-BY 4.0 International license.

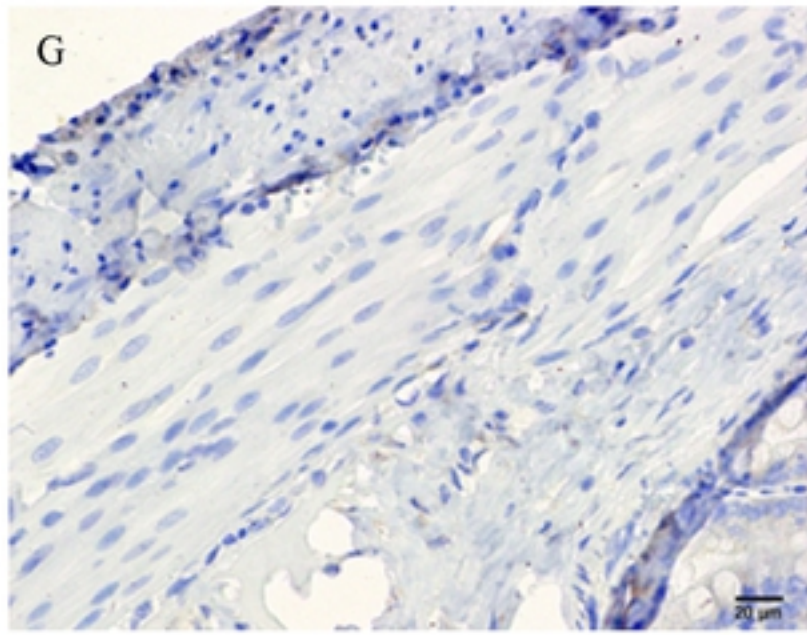

Negative control (400×)

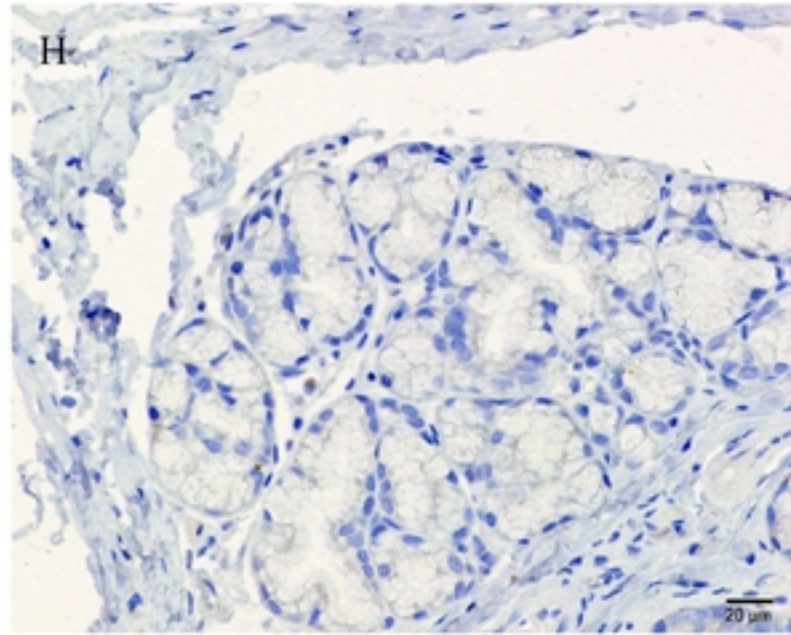

Negative control (400×)
